# Supplementary material for: Structural and Biochemical Analysis Reveals Catalytic Mechanism of Fucoidan Lyase from Flavobacterium sp. SA-0082
Source: MDPI journal article supplement (doi:10.3390/md20080533), 2022-08-20
Supplement: s1 [file s1]

**Figure S1.** Sequence alignment of FdIA and FdIB.

The sequences of FdIA and FdIB (GenBank No. AAO00510.1 and AAO00511.1) from *Flavobacterium* sp. SA-0082 are aligned. The strictly conserved residues are shaded in red. The signal peptide region, the F5/8 type C domain and the por secretion tail region of FdIA were indicated by black, green and pink line, respectively. The por secretion tail region of FdIB was indicated by blue line.

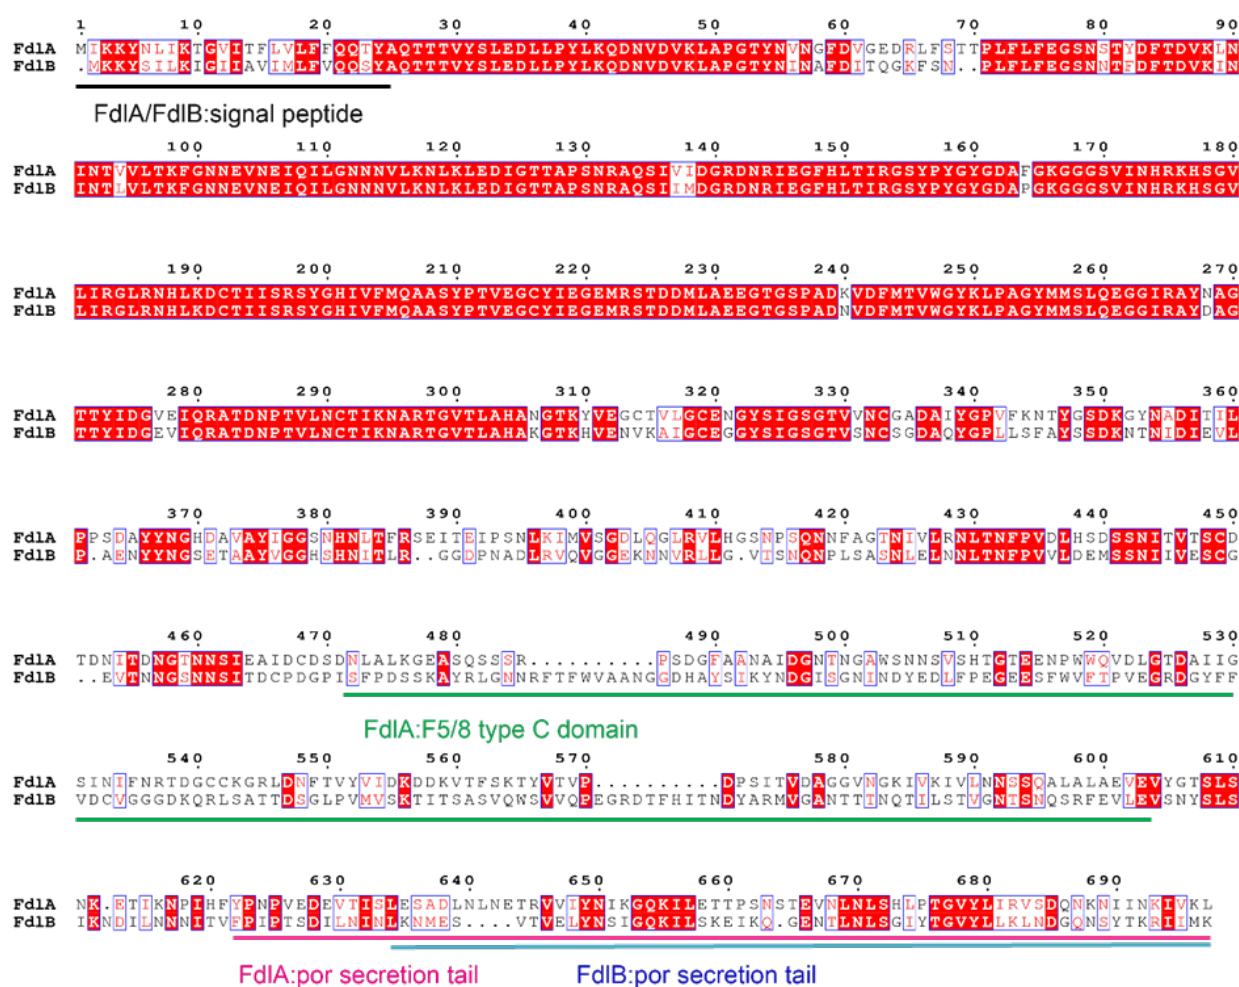

**Figure S2.** Purification and characterization of FdIA-NTD.

(A) Purification of FdIA-NTD by size exclusion chromatography.

(B) SDS-PAGE of recombinant FdIA-NTD (WT and mutants). The molecular weight of markers is labeled.

(C) CD spectra of FdIA-NTD after incubating at different temperatures within 120 min.

(D) CD spectra of FdIA-NTD after incubating at different pH for 17 h.

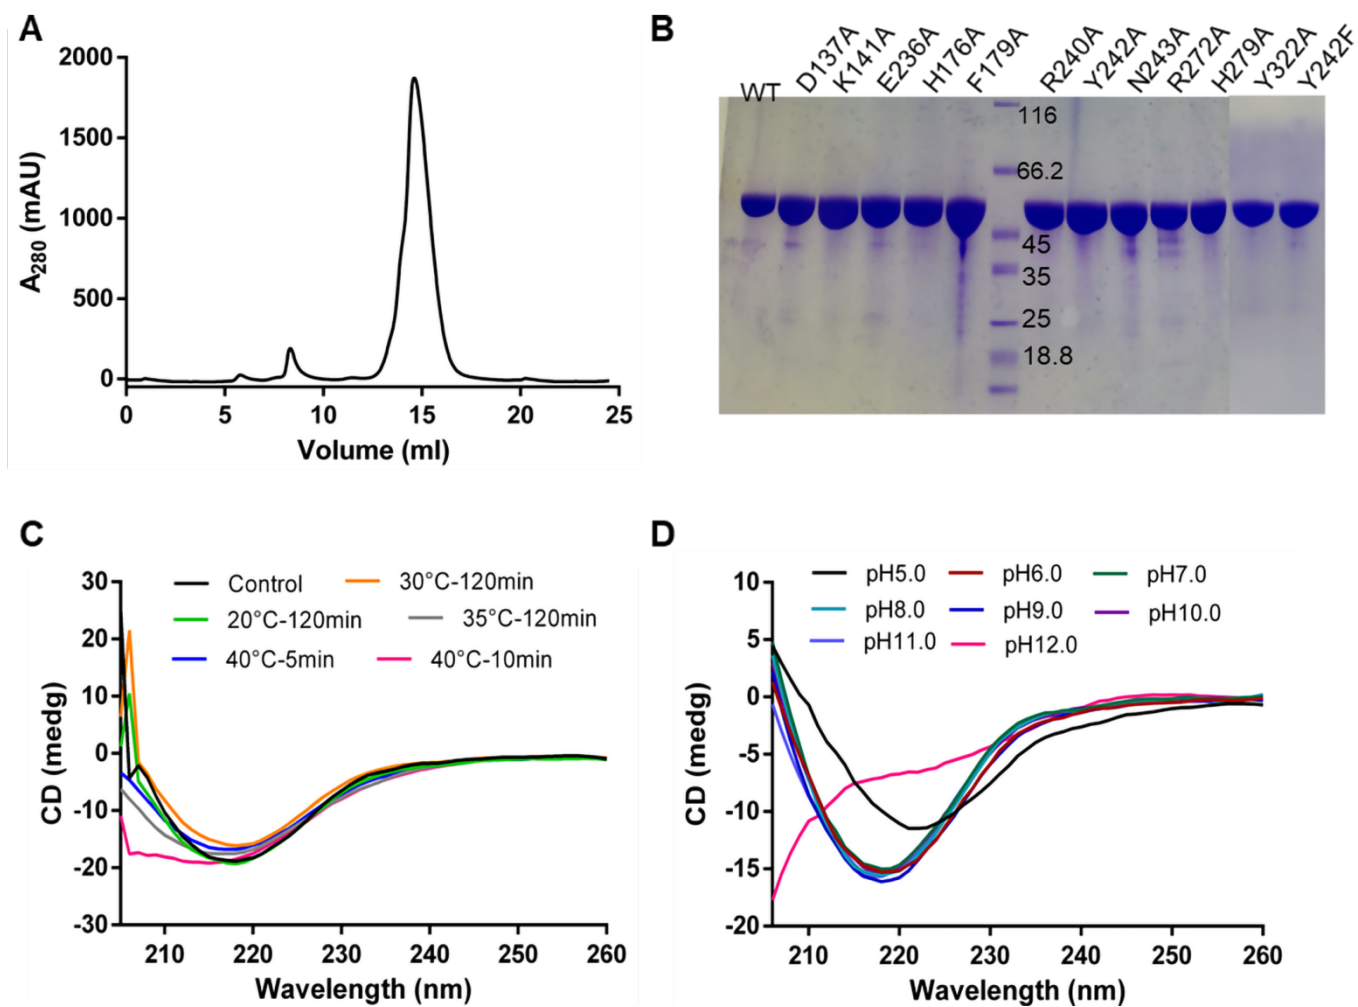

**Figure S3.** Structural superposition of two molecules in an asymmetric unit of FdlA-NTD crystal structure.

Two molecules are coloured green and cyan, respectively.

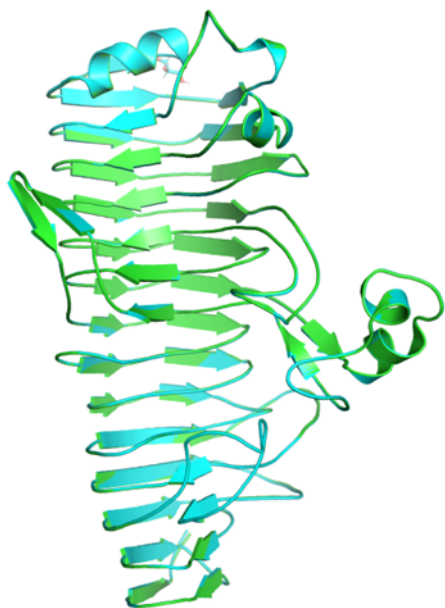

**Figure S4.** Comparison of FdlA-NTD with representative members of other  $\beta$ -helix PL families.

(A-E) Comparison of the sequence, overall structure and active site of FdlA-NTD with representative  $\beta$ -helix PL proteins from PL1 (pectate lyase, PDB code 2ewe) (A), PL3 (pectate lyase, PDB code 4z04 and 4ew9) (B), PL6 (alginate lyase, PDB code 6a40 and 6itg) (C), PL9 (pectate lyase, PDB code 5ols and 5olq) (D), and PL31 (alginate lyase, PDB code 6kfn) (E). The overall structures are shown in cartoon mode and colored green, cyan, yellow, pink, magenta and blue for FdlA-NTD, 2ewe, 4z04, 6a40, 5olr and 6kfn, respectively. The electrostatic surface of the active site of other PL proteins are shown in the zoom-in panel. The substrate and key residues are shown in stick mode, while metal ions are shown as spheres. The sequence alignment of FdlA-NTD with  $\beta$ -helix PLs are shown in lower panel. The catalytic residues of  $\beta$ -helix PLs are marked with circles and not conserved in FdlA-NTD.

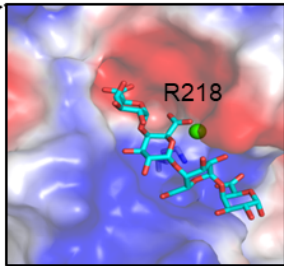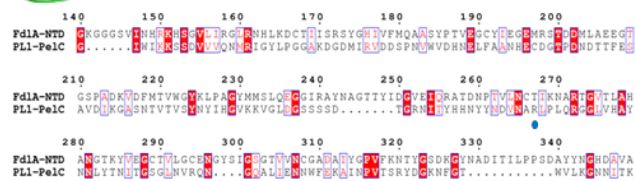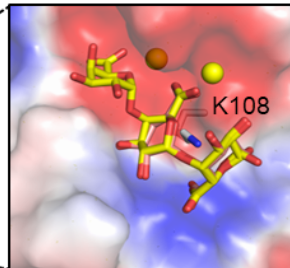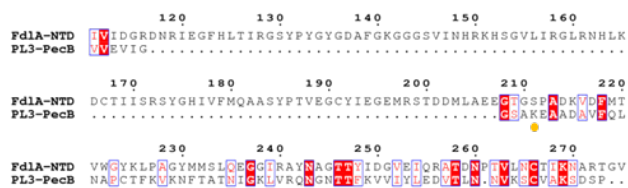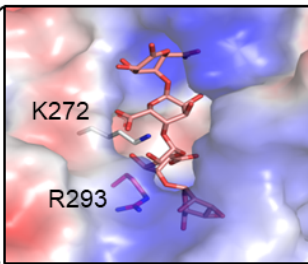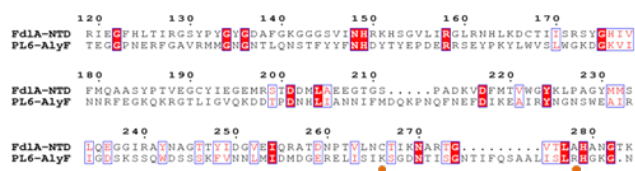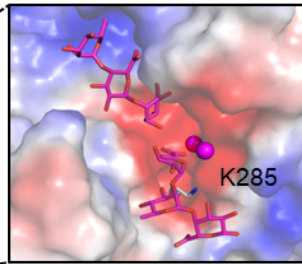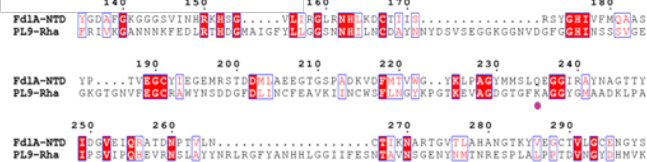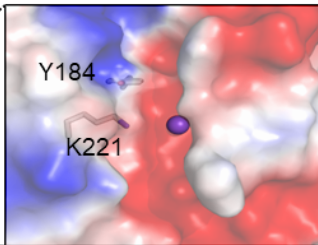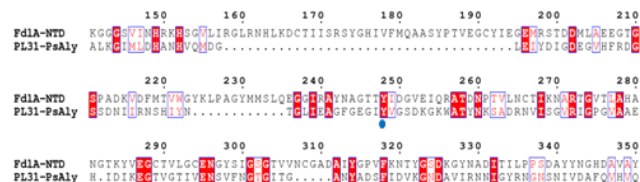

**Figure S5.** The sulfate groups and docked trisaccharide in the ‘groove-pocket’ region of FdlA-NTD.

(A) 2Fo-Fc (blue mesh) and Fo-Fc (green mesh) electron density maps of three sulfate groups contoured at 1.0 and 2.8  $\sigma$ , respectively.

(B) The alkaline pocket is capable of accommodating a monosulfated trisaccharide molecule.

**A**

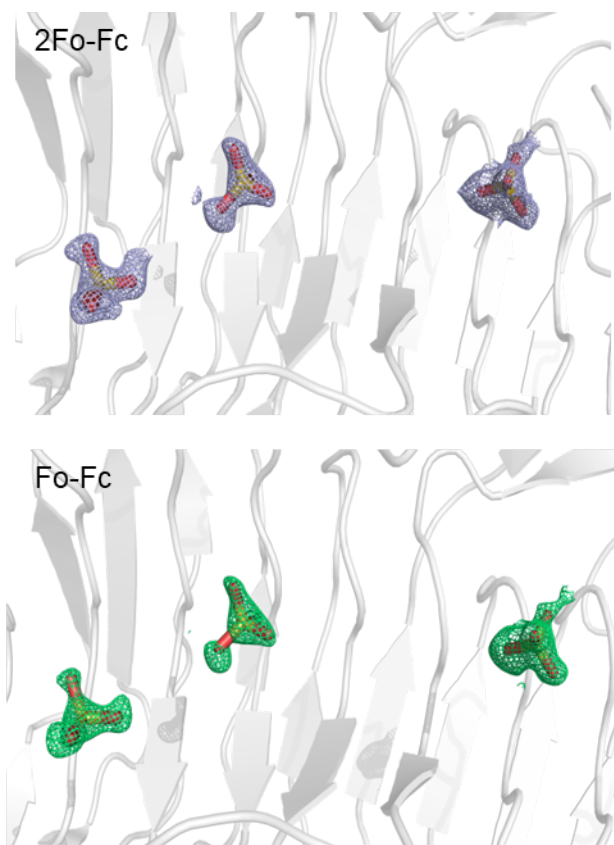

**B**

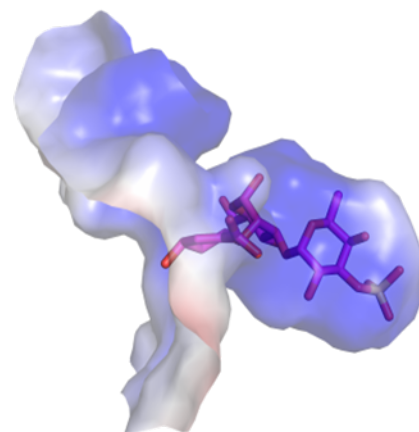

**Figure S6.** The MST curves of inactive mutants of FdlA-NTD with the substrate (Kj-fucoidan).

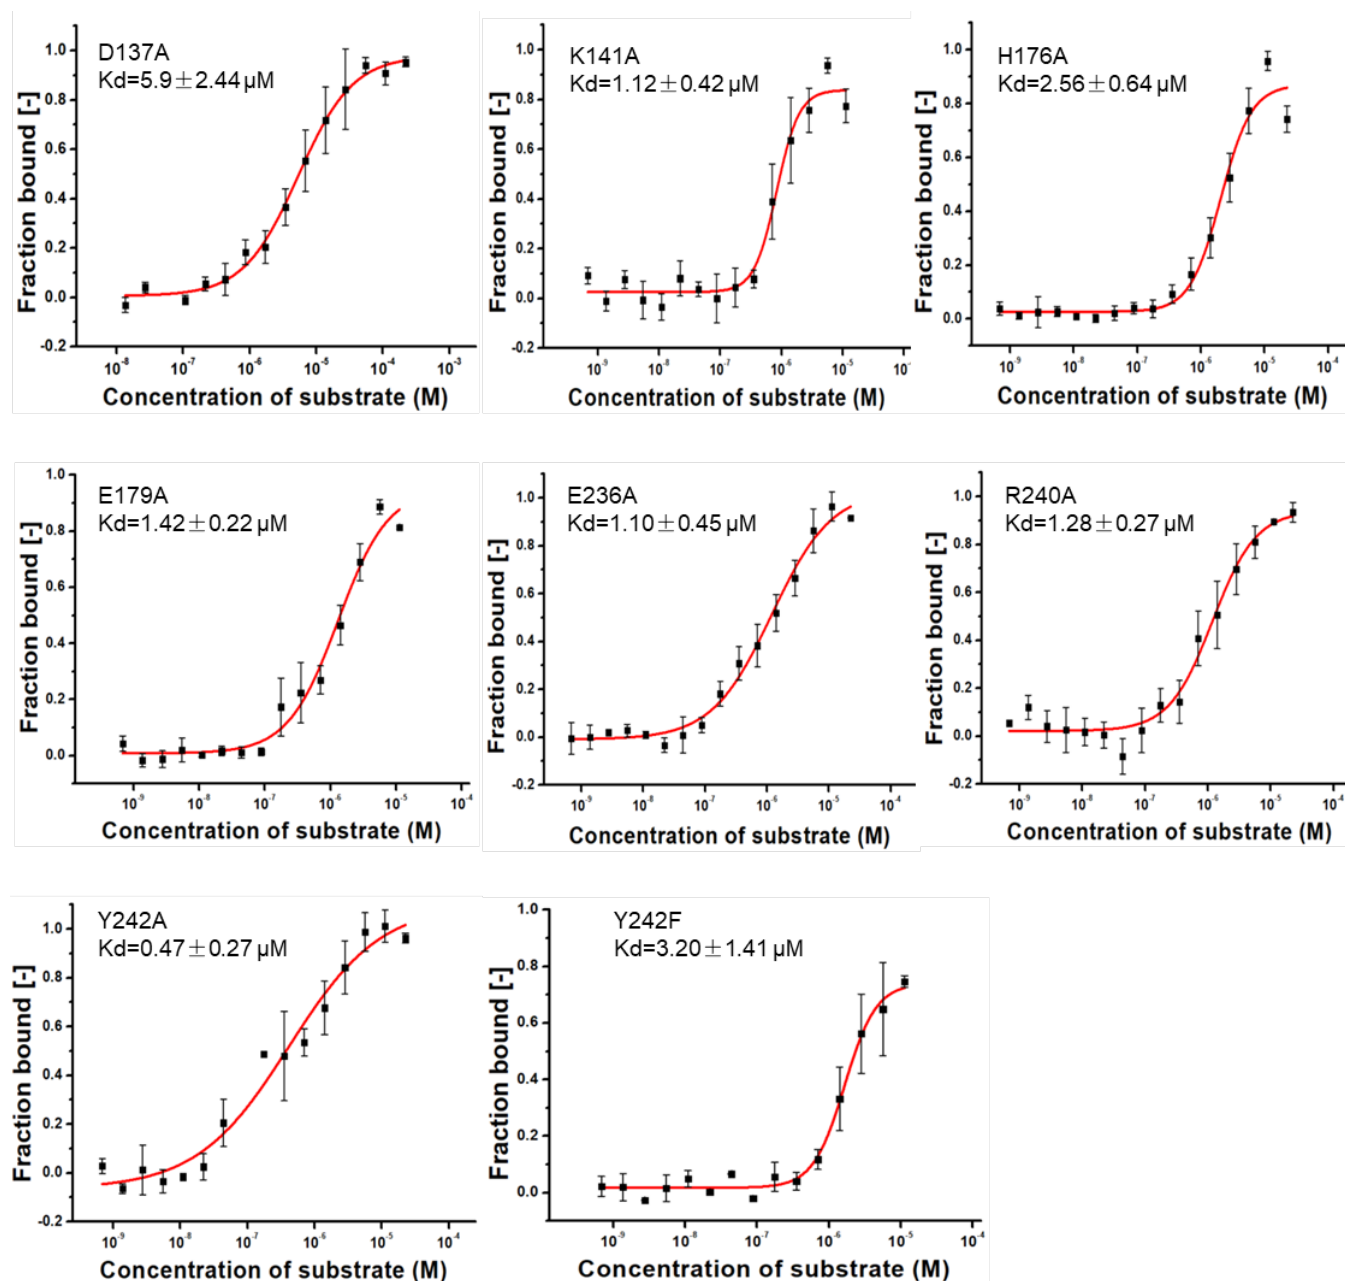



**Figure S7.** Electron density maps of the mutated site in inactive mutants.

(A-H) 2Fo-Fc (blue mesh, contoured at  $1\sigma$ ) and the negative Fo-Fc (red mesh, contoured at  $3\sigma$ ) electron density maps of Y242A (A), Y242F (B), K142A (C), R240A (D), F179A (E), H176A (F), E236A (G) and D137A (H) mutants, showing both the original residue in WT (green sticks) and the mutated residues in mutants (colored sticks).

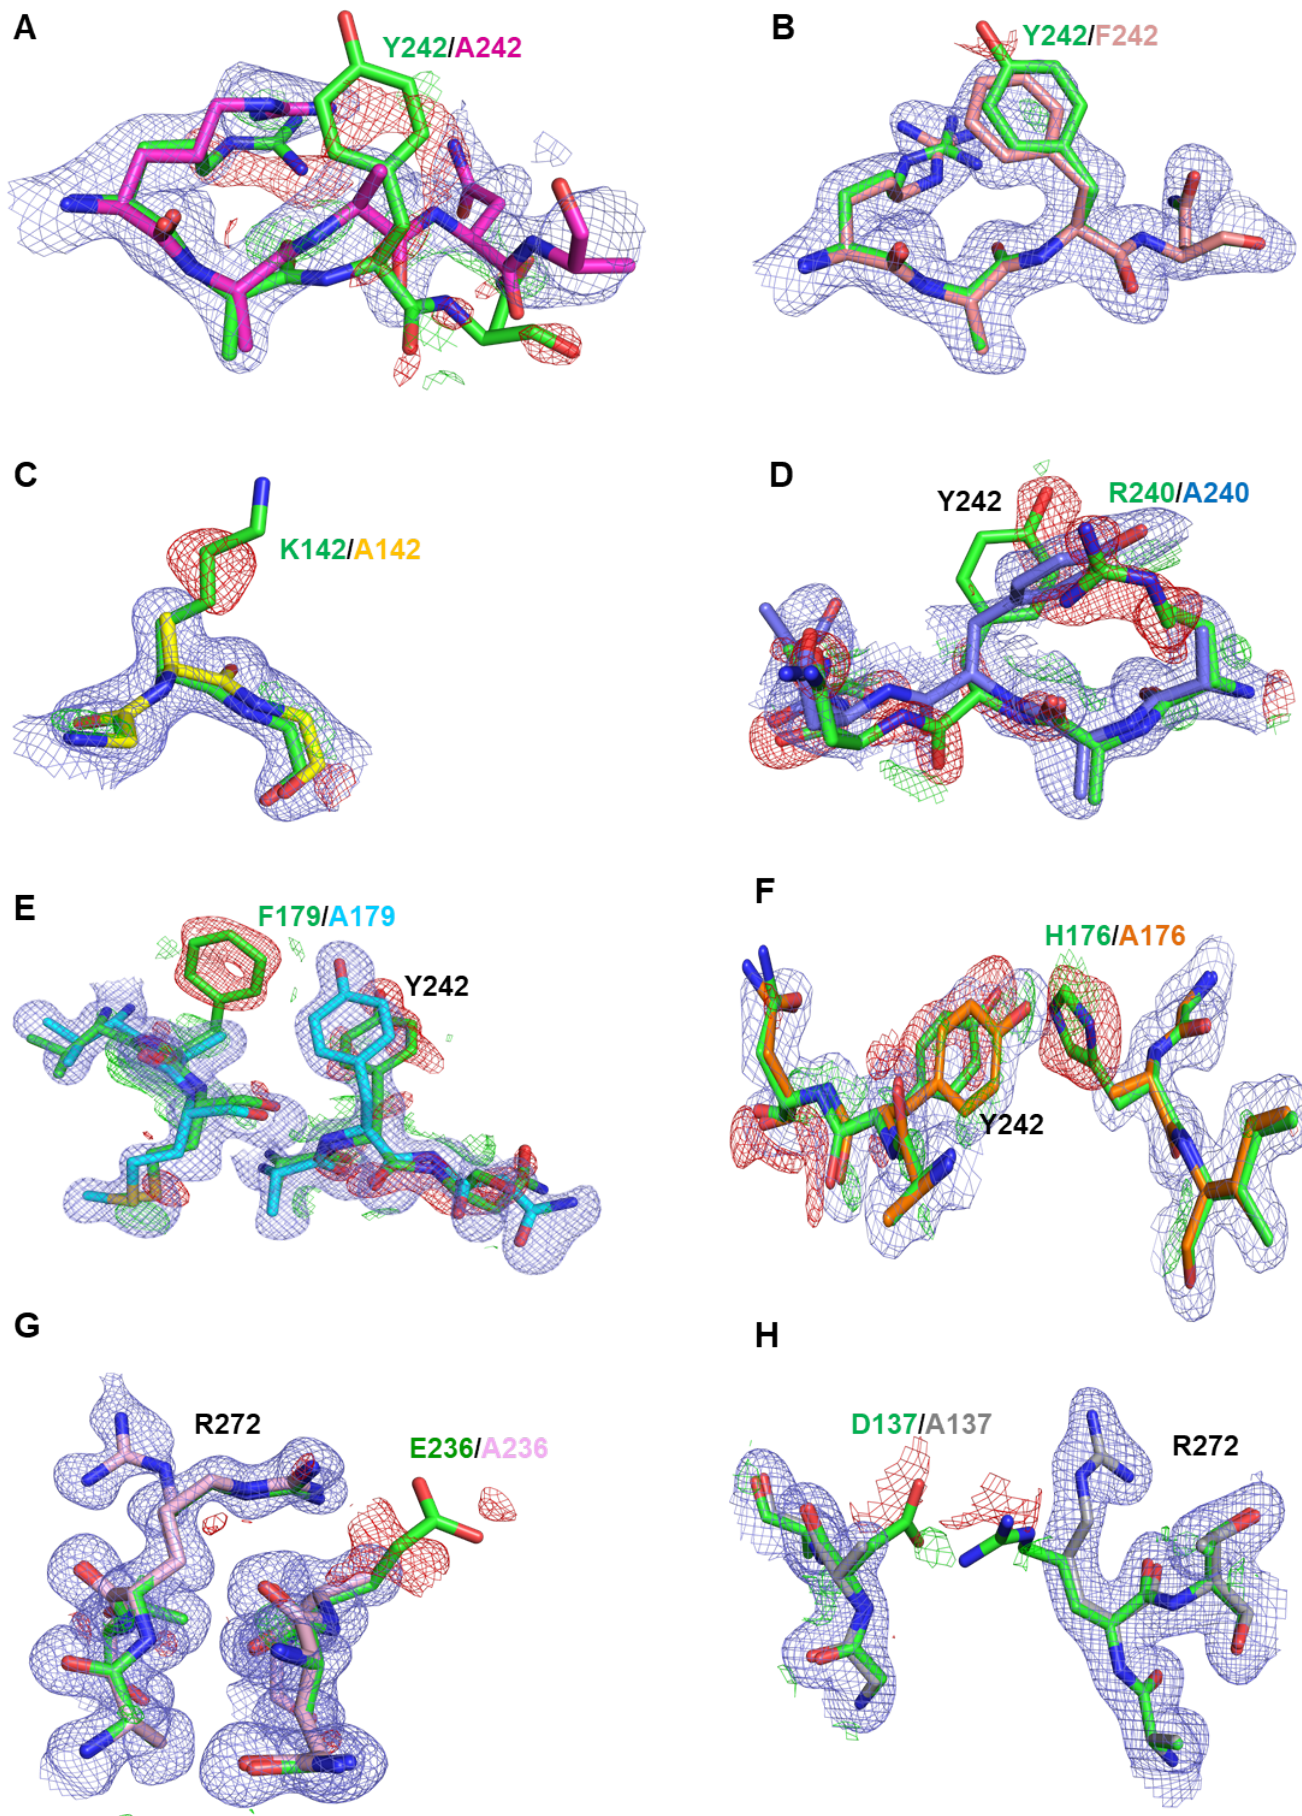



**Table S1. Diffraction data and refinement statistics of WT and mutants of FdIA-NTD.**

|                                     | WT                 | Se-SAD  | D137A   | K141A           | H176A   | F179A   | E236A   | R240A   | Y242A   | Y242F   |
|-------------------------------------|--------------------|---------|---------|-----------------|---------|---------|---------|---------|---------|---------|
| <b>PDB code</b>                     | 7XZF               |         | 7XZ7    | 7XZ8            | 7XZE    | 7XZD    | 7XZ9    | 7XZC    | 7XZB    | 7XZA    |
| <b>Data collection</b>              |                    |         |         |                 |         |         |         |         |         |         |
| Wavelength (Å)                      | 0.9785             | 0.9785  | 0.9792  | 0.9792          | 0.9792  | 0.9791  | 0.9791  | 0.9792  | 0.9792  | 0.9792  |
| Space group                         | P1                 | P1      | P1      | P6 <sub>1</sub> | P1      | P1      | P1      | P1      | P1      | P1      |
| Cell dimensions                     |                    |         |         |                 |         |         |         |         |         |         |
| <i>a</i> , <i>b</i> , <i>c</i> (Å)  | 54.0,              | 52.9,   | 54.5,   | 90.4,           | 54.0,   | 90.2,   | 53.8,   | 53.8,   | 53.6,   | 54.1,   |
|                                     | 58.2,              | 57.9,   | 58.4,   | 90.4,           | 58.2,   | 101.4,  | 58.0,   | 58.0,   | 57.7,   | 58.2,   |
|                                     | 88.3               | 88.3    | 88.3    | 123.6           | 88.5    | 92.2    | 87.9    | 88.1    | 88.2    | 88.2    |
| $\alpha$ , $\beta$ , $\gamma$ (°)   | 90.3,              | 90.3,   | 90.2,   | 90.0,           | 90.2,   | 90.0,   | 90.4,   | 90.2,   | 90.1,   | 90.2,   |
|                                     | 101.6,             | 78.5,   | 101.9,  | 90.0,           | 101.4,  | 101.4,  | 101.6,  | 78.7,   | 101.3,  | 101.7,  |
|                                     | 92.0               | 87.9    | 92.2    | 120.0           | 92.2    | 92.0    | 92.0    | 87.9    | 92.0    | 92.1    |
| Resolution (Å)                      | 86-                | 50-     | 58-     | 34-             | 50-     | 58-     | 50-     | 50-     | 27-     | 86-     |
|                                     | 1.25               | 1.80    | 1.98    | 1.89            | 1.80    | 1.65    | 1.54    | 1.70    | 2.25    | 2.08    |
|                                     | (1.27-             | (1.86-  | (2.00-  | (1.95-          | (1.86-  | (1.74-  | (1.59-  | (1.80-  | (2.33-  | (2.19-  |
|                                     | 1.25) <sup>a</sup> | 1.80)   | 1.98)   | 1.89)           | 1.80)   | 1.65)   | 1.54)   | 1.70)   | 2.25)   | 2.08)   |
| $R_{\text{merge}}$ <sup>b</sup>     | 0.062              | 0.201   | 0.079   | 0.156           | 0.070   | 0.084   | 0.171   | 0.090   | 0.163   | 0.120   |
|                                     | (0.781)            | (0.855) | (0.479) | (0.854)         | (0.542) | (0.276) | (0.477) | (0.388) | (0.401) | (0.238) |
| <i>I</i> / $\sigma$ ( <i>I</i> )    | 8.9                | 10.3    | 6.7     | 9.7             | 24.3    | 6.0     | 5.3     | 7.2     | 3.3     | 3.9     |
|                                     | (5.2)              | (1.9)   | (2.3)   | (0.8)           | (2.4)   | (2.2)   | (2.5)   | (4.0)   | (2.3)   | (2.8)   |
| Completeness                        | 95.1               | 96.5    | 91.0    | 99.1            | 92.5    | 71.1    | 96.3    | 93.8    | 95.5    | 91.0    |
| (%)                                 | (92.7)             | (93.6)  | (92.2)  | (92.9)          | (93.9)  | (83.5)  | (94.1)  | (68.2)  | (87.5)  | (94.6)  |
| Redundancy                          | 2.0                | 10.5    | 3.8     | 19.9            | 6       | 2.3     | 3.4     | 3.7     | 3.3     | 1.7     |
|                                     | (2.0)              | (10.3)  | (3.8)   | (18.3)          | (4.9)   | (1.8)   | (3.1)   | (3.6)   | (3.4)   | (1.7)   |
| <b>Refinement</b>                   |                    |         |         |                 |         |         |         |         |         |         |
| Resolution (Å)                      | 25-                |         | 33-     | 23-             | 53-     | 28-     | 35-     | 48-     | 27-     | 28-     |
|                                     | 1.30               |         | 1.98    | 1.89            | 1.80    | 1.75    | 1.54    | 1.70    | 2.25    | 2.08    |
| No. reflections                     | 246,129            |         | 67,726  | 45,432          | 91,196  | 75,469  | 148,432 | 107,676 | 46,797  | 57,259  |
| $R_{\text{work}} / R_{\text{free}}$ | 0.136/             |         | 0.156/  | 0.180/          | 0.158/  | 0.169/  | 0.164/  | 0.164/  | 0.185/  | 0.173/  |
|                                     | 0.158              |         | 0.198   | 0.212           | 0.189   | 0.195   | 0.188   | 0.192   | 0.220   | 0.226   |
| No. atoms                           |                    |         |         |                 |         |         |         |         |         |         |
| Protein                             | 7,188              |         | 6,706   | 3,415           | 6,819   | 6,820   | 6,879   | 6,833   | 6,737   | 6,850   |
| Ligand                              | 61                 |         |         |                 | 20      | 5       |         |         | 10      |         |
| Water                               | 962                |         | 660     | 274             | 887     | 988     | 1208    | 725     | 622     | 582     |
| B-factors (Å <sup>2</sup> )         |                    |         |         |                 |         |         |         |         |         |         |
| Protein                             | 11.0               |         | 31.8    | 41.8            | 17.6    | 15.3    | 10.6    | 19.4    | 17.9    | 17.6    |
| Ligand                              | 24.0               |         |         |                 | 42.5    | 18.2    |         |         | 59.6    |         |
| Water                               | 25.9               |         | 40.2    | 51.2            | 33.7    | 28.3    | 27.0    | 30.5    | 28.4    | 26.0    |
| R.m.s. deviations                   |                    |         |         |                 |         |         |         |         |         |         |
| bond length (Å)                     | 0.014              |         | 0.018   | 0.007           | 0.014   | 0.009   | 0.006   | 0.012   | 0.005   | 0.008   |
| bond angle (°)                      | 0.4                |         | 1.45    | 0.92            | 1.12    | 1.07    | 0.89    | 1.09    | 0.89    | 0.95    |
| <b>Ramachandran Plot</b>            |                    |         |         |                 |         |         |         |         |         |         |
| Favoured (%)                        | 97.2               |         | 96.7    | 96.8            | 96.7    | 96.6    | 96.9    | 97.1    | 96.7    | 96.7    |
| Allowed (%)                         | 2.83               |         | 3.3     | 3.17            | 3.29    | 3.4     | 3.0     | 2.95    | 3.3     | 3.29    |
| Outliers (%)                        | 0.00               |         | 0.00    | 0.00            | 0.00    | 0.00    | 0.00    | 0.00    | 0.00    | 0.00    |

<sup>a</sup> Numbers in parentheses refer to data in the highest resolution shell.<sup>b</sup>  $R_{\text{merge}} = \sum_{\text{hkl}} \sum_i |I(\text{hkl})_i - \langle I(\text{hkl}) \rangle| / \sum_{\text{hkl}} \sum_i \langle I(\text{hkl})_i \rangle$
